# Supplementary material for: Wnt/β-Catenin Pathway-Regulated Fibromodulin Expression Is Crucial for Breast Cancer Metastasis and Inhibited by Aspirin
Source: PubMed Central journal article supplement (PMC6886402; doi:10.3389/fphar.2019.01308), 2019-11-25
Supplement: DataSheet_1.pdf [file DataSheet_1.pdf]

## Supplemental Information

### Wnt/ $\beta$ -Catenin Pathway-Regulated Fibromodulin Expression Is Crucial for Breast Cancer Metastasis and Inhibited by Aspirin

Fahim Ullah Khan<sup>1,2</sup>, Nana Yaa Gyaama Owusu-Tieku<sup>3</sup>, Xiaoyong Dai<sup>3</sup>, Kewei Liu<sup>1,2</sup>, Yanping Wu<sup>1,2</sup>, Chunhui Sun<sup>3</sup>, Laiqiang Huang<sup>1,2,3,\*</sup>.

Tsinghua University

**Table 1. shRNA Sequence**

| Gene name                                                 | Sequence 5'-3'                                                                        |
|-----------------------------------------------------------|---------------------------------------------------------------------------------------|
| <b>1. FMODshRNA1 (Human)-sense</b>                        | GATCCGCTCTTGAGCAGCTGTACATTCAAGAGATGTACAGCTGCTCAAGAGCTTTTTTGGAAA                       |
| <b>FMOD shRNA1 (Human)-anti-sense</b>                     | AGCTTTTCCAAAAAAGCTCTTGAGCAGCTGTACATCT CTTGAATGTACAGCTGCTCAAGAGCG                      |
| <b>2. FMODshRNA2 (Human)-sense</b>                        | GATCCAGCTCTTGAGCAGCTGTACTTC AAGAGAGTACAGCTGCTCAAGAGCTTTTTTGGAAA                       |
| <b>FMOD shRNA2 (Human)-anti-sense</b>                     | AGCTTTTCCAAAAAAGCTCTTGAGCAGCTGTAC TCTCTTGAAGTACAGCTGCTCAAGAGCTG                       |
| <b>3. <math>\beta</math>-catenin Human shRNA-sense</b>    | GATCCTTGGAATGAGACTGCTGATTC AAGAGAATCAGCAGTCTCATTCCAATTTTTTGGAAA                       |
| <b><math>\beta</math>-catenin Human shRNA-anti- sense</b> | AGCTTTTCCAAAAAATTGGAATGAGACTGCTGATTCTCTT GAAATCAGCAGTCTCATTCCAAG                      |
| <b>4. TCF4 Human shRNA-sense</b>                          | ATCCTTACCTCCTGTGAGCAGTTTCAAGAGAACTGCTCACAGGAGGTGAATTTTTTGGAAA                         |
| <b>TCF4 Human shRNA-anti- sense</b>                       | AGCTTTTCCAAAAAATTCACCTCCTGTGAGCAGTTCTCTTGAAACTGCTCACAGGAGGTGAAG                       |
| <b>5. LEF1 shRNA Human-sense</b>                          | GATCC GAT CTT CGC CGA GAT CAG T TT C AAG AGA ACT GAT CTC GGC GAA GAT C<br>TTTTTGGAA A |
| <b>LEF1 shRNA Human-anti-sense</b>                        | AGCTTTTCCAAAAAAGATCTTCGCCGAGATCAGTTCTCTTGAAACTGATCTCGGCCGAAGATCG                      |

**Table 2. Primers Used in Cloning and for qPCR**

| Gene name                    | 5'-3' Sense Primer        | 5'-3' Anti-Sense Primer   |
|------------------------------|---------------------------|---------------------------|
| 1. FMOD (Human)              | ATGCAGTGGACCTCCCTCCT      | TCAGATCTCGATGAGGCTGG      |
| 2. FMOD (Mouse)              | ATGCTTTGGAGGGCCTGGAG      | TCAGATCTCGATGAGGTTGG      |
| 3. GAPDH (Human)             | CCAGAACATCATCCCTGCCTCTACT | GGTTTTTCTAGACGGCAGGTCAGGT |
| 4. GAPDH (Mouse)             | TGGATTTGGACGCATTGGTC      | TTGCACTGGTACGTGTTGAT      |
| 5. TCF7 (Human)              | TGCAGCTATACCCAGGCTGG      | CCTCGACCGCCTCTTCTTC       |
| 6. TCF7 (Mouse)              | CCCAGCTTTCTCCACTCTAC      | TGTGAACTCCTTGCTTCTGG      |
| 7. LEF1(Human)               | CGACGCCAAAGGAACACTGACATC  | GCACGCAGATATGGGGGAGAAA    |
| 8. LEF1(Mouse)               | GCAGCTATCAACCAGATCC       | GATGTAGGCAGCTGTTCATTC     |
| 9. N-Cadherin(Human)         | ATGTGCCGGATAGCGGGAGC      | TACACCGTGCCGTCCTCGTC      |
| 10. $\beta$ -catenin (Human) | CAACTAAACAGGAAGGGATG      | CACAGGTGACCACATTTATATC    |
| 11. TCF4 (Human)             | ATGGCAAATAGAGGAAGCGG      | TGGAGAATAGATCGAAGCAAG     |

**Table 3. Primers Used in Cloning**

| Gene name             | Sequence 5'-3'                       |
|-----------------------|--------------------------------------|
| 1. Wnt-3a-sense       | AAATTAAGCTTATGGCCCCACTCGGATACTTC     |
| Wnt-3a- anti-sense    | TATGGTACCCTTGCAAGGTGTGCACGTCGTAGAC   |
| 2. FMOD-PGL3 -sense   | CGCTCGAGACTGATGAGCCCTCTTTCTCATCTATTC |
| FMOD-PGL3 -anti-sense | CATGCCATGGCTTGAGGAGAGGACTGTGATTAGA   |
| 3. FMOD-PBOBI-sense   | TGCTCTAGAATGCAGTGGACCTCCCTCCTG       |
| FMOD-PBOBI-anti-sense | CCGCTCGAGGGAGAAGTTCACGACGTCCACC      |
